# Supplementary material for: Trans‐generational epigenetic regulation associated with the amelioration of Duchenne Muscular Dystrophy
Source: PubMed Central journal article supplement (PMC7411655; doi:10.15252/emmm.202012063), 2020-06-29

Figure 4B

CEL2a

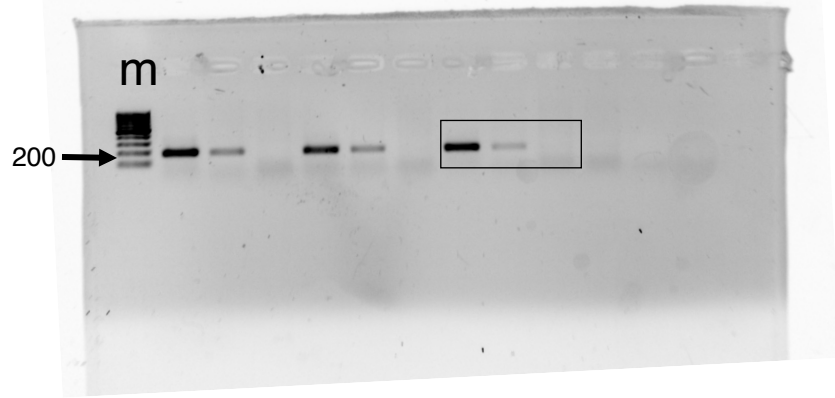

m  
400  
200

CEL2c

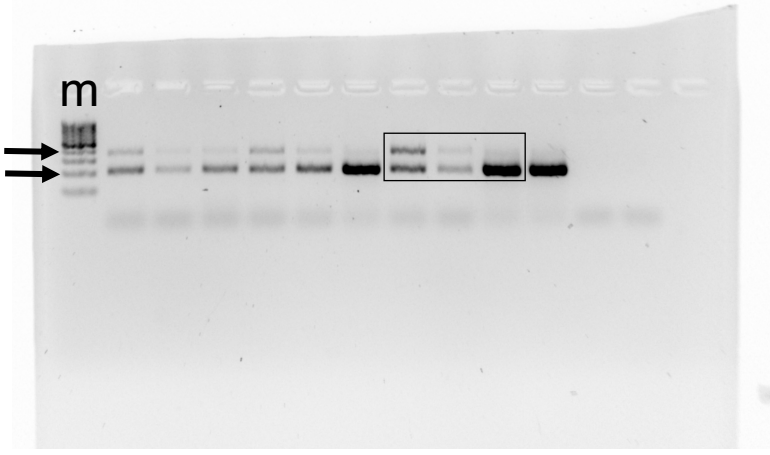

CEL2b

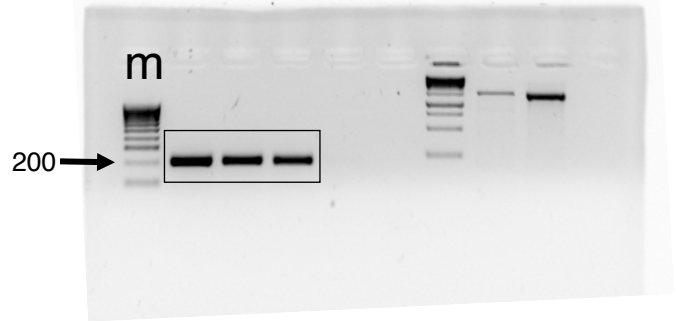

m  
500  
400  
300

CEL2α

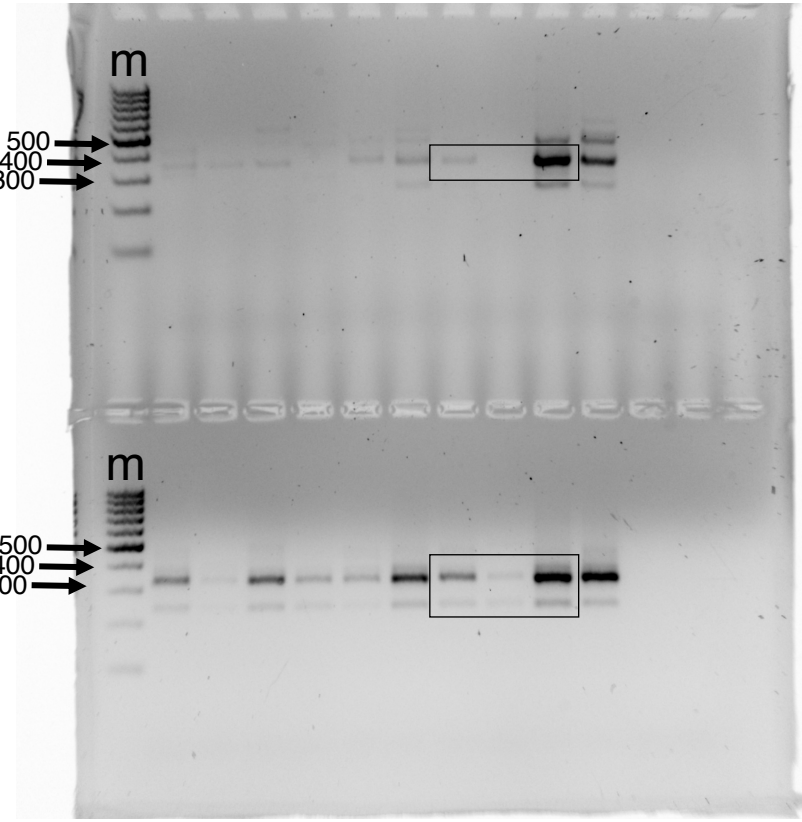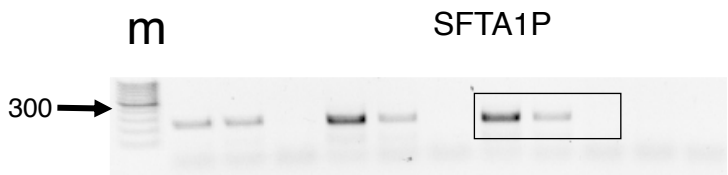

m  
500  
400  
300

CEL2β

m = 100bp marker  
M = 1kb marker

Figure 4B

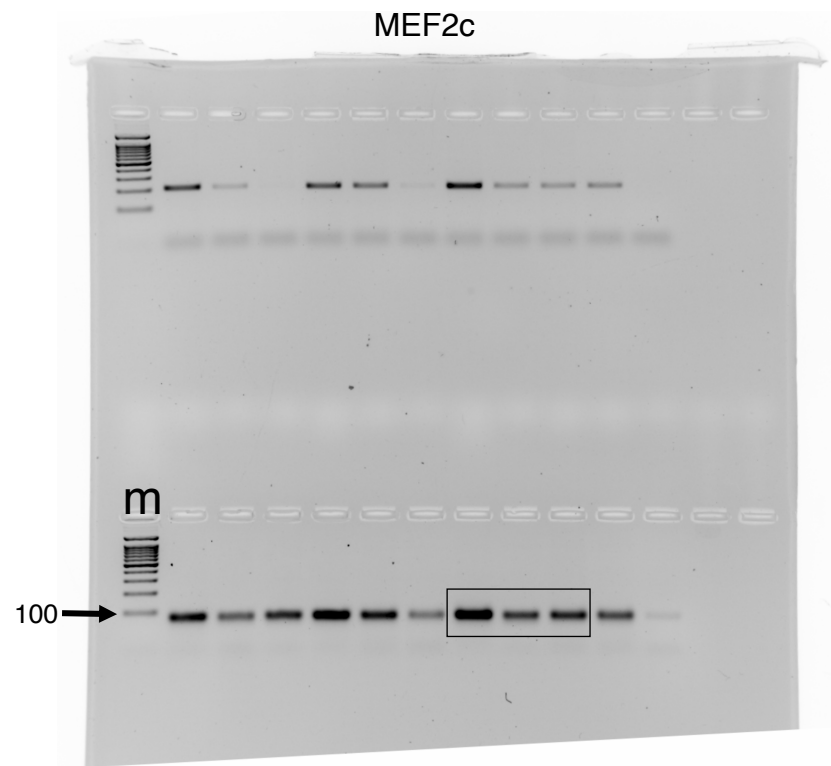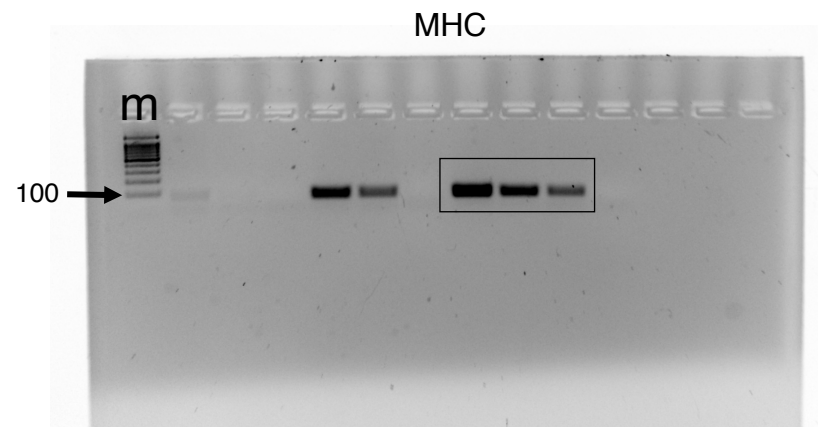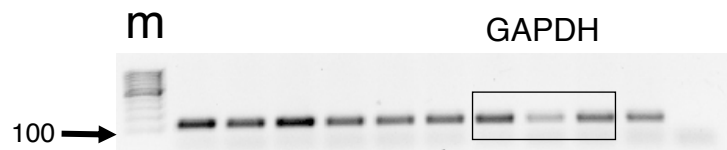



Figure 4C

CELF2a

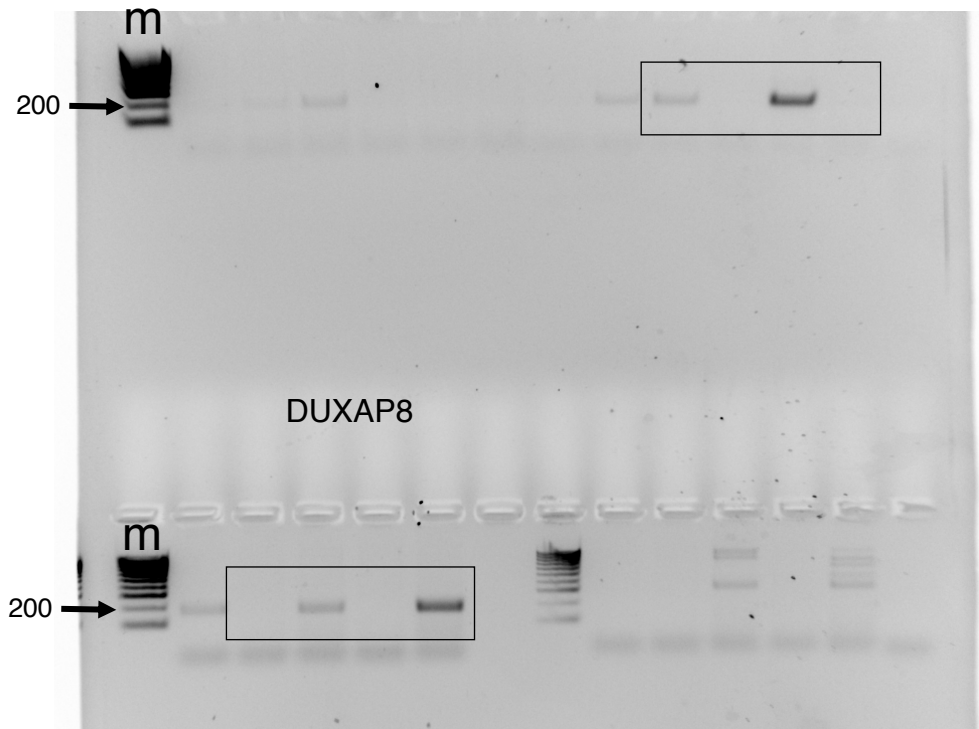

GAPDH

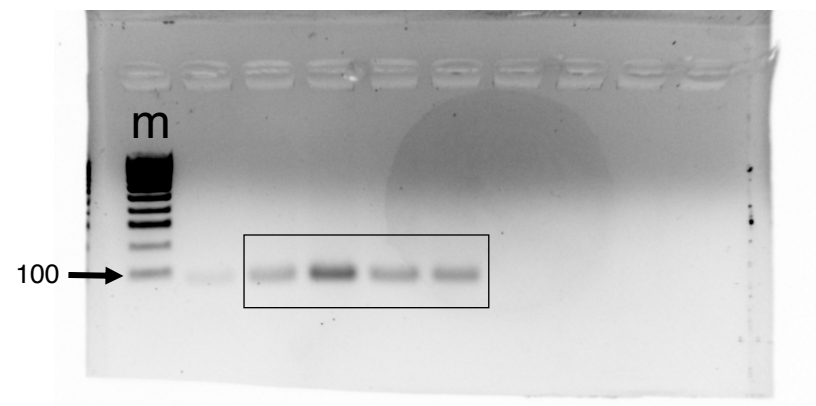

Figure 4D

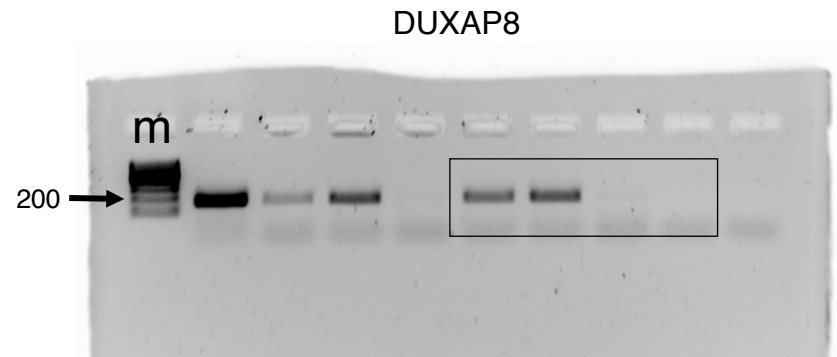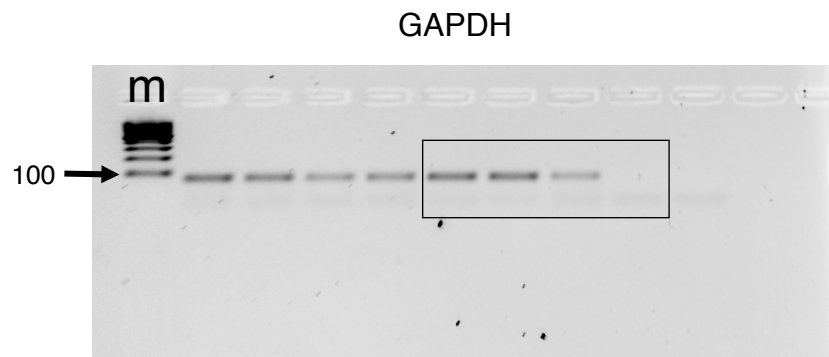



Figure 4F

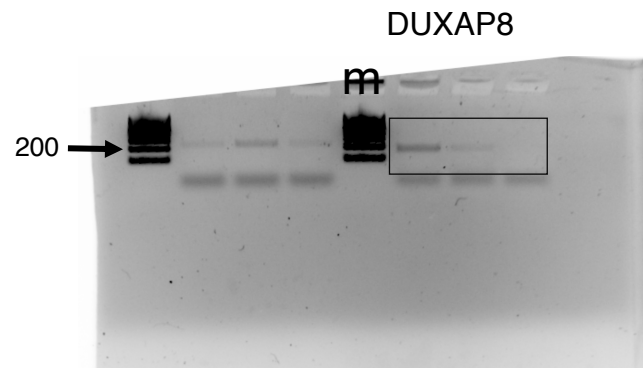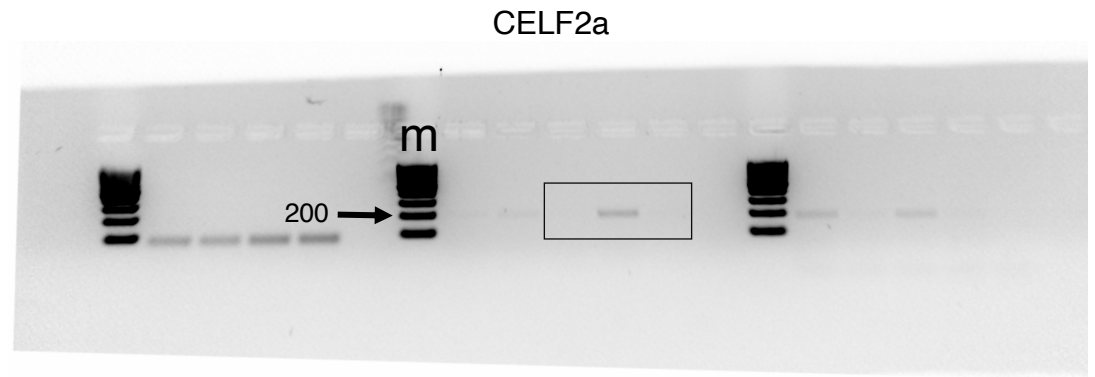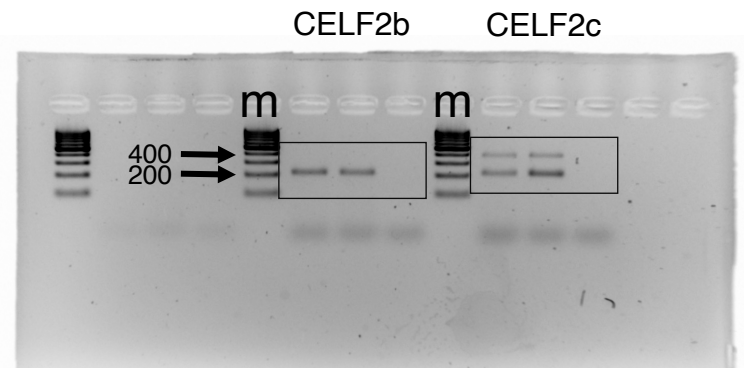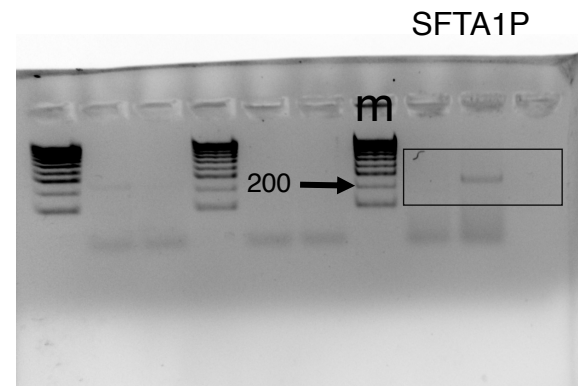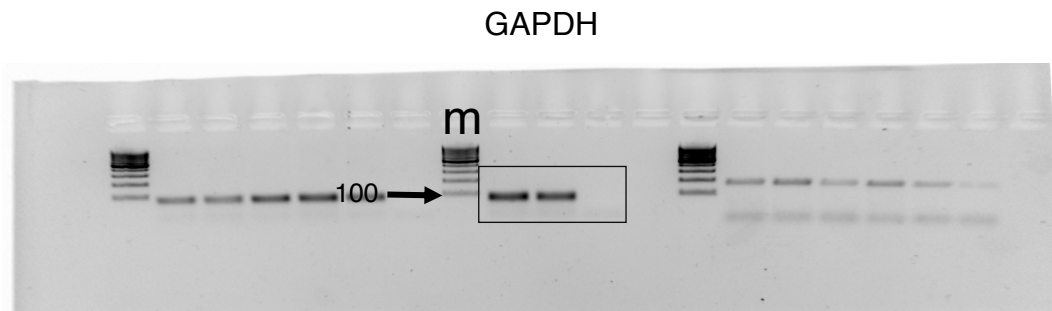

Supplement: EMMM-12-e12063-s005.pdf [file EMMM-12-e12063-s005.pdf]
